# Supplementary material for: Mechanism of promoter repression by Lac repressor–DNA loops
Source: PubMed Central journal article supplement — Nucleic Acids Res. 2012 Nov 7;41(1):156–66. doi: 10.1093/nar/gks1011 (PMC3592455; doi:10.1093/nar/gks1011), 2012-11-07
Supplement: supp_gks1011_nar-01621-f-2012-File010.pdf [file supp_gks1011_nar-01621-f-2012-File010.pdf]

**Supplemental material****Supplemental method:** Chromatin Immunoprecipitation.

After formaldehyde treatment and cell lysis and sonication as described in the methods section, DNA was further reduced to 200-400 bp fragment sizes by addition of 25  $\mu$ L micrococcal nuclease digestion solution (15 mM Tris-HCl pH 8.0, 1 mM  $\text{CaCl}_2$ , 60 mM KCl, 15 mM NaCl, 300 mM sucrose, 0.5 mM DTT) followed by 5  $\mu$ L of 2000 U/ $\mu$ L micrococcal nuclease (New England Biolabs). Following incubation at 37°C for 20 min, each reaction was stopped by addition of 125  $\mu$ L of 0.5 M EDTA solution. Cellular debris was removed by centrifugation. A 50- $\mu$ L lysate aliquot was used for each immunoprecipitation. To this aliquot was added 200  $\mu$ L IP buffer and 5  $\mu$ g specific antibody [(monoclonal antibodies to RNA polymerase  $\alpha$  subunit or  $\sigma^{70}$  subunit (Neoclone)]. Immunoprecipitation samples were incubated overnight at 4° C with slow rotation. 50  $\mu$ L of UltraLink protein A/G beads (Thermo Scientific) were then added to each sample with slow rotation at room temperature for 2 h. Beads were collected by centrifugation in Spin-X 0.22  $\mu$ m CA spin filters (Costar). Samples were washed once with IP buffer, once with LiCl wash buffer (250 mM LiCl, 100 mM Tris pH 8.0, 2% Triton X-100), twice with 600 mM NaCl wash buffer (100 mM Tris-HCl 8.0, 600 mM NaCl, 2% Triton X-100), twice with 300 mM NaCl wash buffer (100 mM Tris-HCl 8.0, 300 mM NaCl, 2% Triton X-100) and twice with a solution of 10 mM Tris-HCl (pH 8) containing 1 mM EDTA. DNA/protein complexes were collected by elution in 200  $\mu$ L of buffer containing 50 mM Tris-HCl 8.0, 10 mM EDTA, 1% SDS at 65°C for 30 min. RNaseA (10  $\mu$ L of 10 mg/mL stock) and proteinase K (10  $\mu$ L of 10 mg/mL stock) were added to each sample. DNA-protein crosslinks were reversed by overnight incubation at

65°C. DNA was then purified using a QIAquick PCR clean up kit (Qiagen) with elution in a final volume of 200 µL of water. Real-time PCR was performed in triplicate using a Bio-Rad iCycler and a PerfeCTa™ SYBR Green Fast Mix™ for iQ real-time PCR kit (Quanta Biosciences) as specified by the manufacturer. PCR primers specific for the *lac* promoter region in the F128 episome (5'-TATCACGAG<sub>2</sub>C<sub>3</sub>T<sub>3</sub>CGTC and 5'-CGTA<sub>2</sub>TCATG<sub>2</sub>TCATAGCTGT<sub>3</sub>C) were used to determine DNA fragment enrichment. PCR cycling was: 95°C (30 s); 40 cycles of 60°C (30 s), 95°C (1 min), 55°C (2 min). Denaturation curves were generated in the instrument to confirm amplification of a single PCR product. Analysis was based on the threshold cycle (C<sub>t</sub>). Differences in starting lysate amounts were corrected using values calculated from 10% input controls and fold enrichment used a promoter-less control for normalization. All ChIP assays were repeated three times.

**Table S1****Downstream O2/Osym**

| <b>spacing(a)</b> | <b>plasmid</b> | <b>strain</b> |
|-------------------|----------------|---------------|
| 69.5              | pJ1911         | BL1072        |
| 68.5              | pJ1912         | BL1074        |
| 67.5              | pJ1910         | BL1068        |
| 62.5              | pJ1888         | BL1046        |
| 60.5              | pJ1889         | BL1048        |
| 58.5              | pJ1890         | BL1050        |
| 56.5              | pJ1852         | BL990         |
| 54.5              | pJ1838         | BL992         |
| 52.5              | pJ1839         | BL1024        |
| 50.5              | pJ1840         | BL994         |
| 48.5              | pJ1853         | BL996         |
| 46.5              | pJ1841         | BL998         |
| 44.5              | pJ1842         | BL1000        |
| 42.5              | pJ1843         | BL1002        |
| 41.5              | pJ1893         | BL1056        |
| 40.5              | pJ1854         | BL1004        |
| 39.5              | pJ1894         | BL1058        |
| 38.5              | pJ1844         | BL1006        |
| 37.5              | pJ1895         | BL1060        |
| 36.5              | pJ1845         | BL1008        |
| 35.5              | pJ1896         | BL1062        |
| 34.5              | pJ1846         | BL1010        |
| 33.5              | pJ1897         | BL1064        |
| 32.5              | pJ1847         | BL1012        |
| 30.5              | pJ1855         | BL1014        |
| 28.5              | pJ1848         | BL1016        |
| 26.5              | pJ1837         | BL1018        |
| 25.5              | pJ1898         | BL1066        |
| 24.5              | pJ1861         | BL1026        |
| 22.5              | pJ1862         | BL1028        |
| 20.5              | pJ1863         | BL1030        |

**Downstream Osym only**

| <b>spacing (b)</b> | <b>plasmid</b> | <b>strain</b> |
|--------------------|----------------|---------------|
| 67.5               | pJ1935         | BL1087        |
| 66.5               | pJ1908         | BL1070        |
| 62.5               | pJ1934         | BL1088        |
| 56.5               | pJ1849         | BL1044        |
| 50.5               | pJ1779         | BL968         |
| 44.5               | pJ1932         | BL1081        |
| 42.5               | pJ1933         | BL1083        |
| 41.5               | pJ1936         | BL1089        |

(a) Indicates spacing in bp from center of O2 to center of Osym.

(b) Indicates spacing in bp from center of dead O2 to center of functional Osym.

**Table S2**

| <b>upstream</b>     | <b>E-IPTG<br/>average(*)</b> | <b>sd(*)</b> | <b>E+IPTG<br/>average(*)</b> | <b>sd(*)</b> |
|---------------------|------------------------------|--------------|------------------------------|--------------|
| <b>Osym-O2</b>      |                              |              |                              |              |
| 49.5                |                              |              |                              |              |
| 50.5                |                              |              |                              |              |
| 51.5                |                              |              |                              |              |
| 52.5                |                              |              |                              |              |
| 53.5                |                              |              |                              |              |
| 54.5                |                              |              |                              |              |
| 55.5                |                              |              |                              |              |
| 57.5                |                              |              |                              |              |
| 59.5                |                              |              |                              |              |
| 62.5                |                              |              |                              |              |
| 63.5                | 16.113                       | 6.525        | 905.081                      | 130.881      |
| 64.5                | 6.118                        | 1.026        | 593.962                      | 85.541       |
| 65.5                | 6.776                        | 0.810        | 671.263                      | 144.889      |
| 66.5                | 5.911                        | 0.577        | 367.261                      | 84.026       |
| 67.5                | 4.344                        | 0.641        | 155.750                      | 37.047       |
| 68.5                |                              |              |                              |              |
| 69.5                |                              |              |                              |              |
| 70.5                | 16.895                       | 2.489        | 522.824                      | 74.554       |
| 71.5                | 17.092                       | 3.022        | 553.266                      | 72.633       |
| 72.5                | 19.596                       | 4.240        | 568.988                      | 124.858      |
| 73.5                | 32.972                       | 8.475        | 734.275                      | 86.648       |
| 74.5                | 24.414                       | 7.842        | 635.396                      | 97.210       |
| 75.5                | 12.227                       | 1.621        | 660.628                      | 67.778       |
| 76.5                | 6.179                        | 1.054        | 414.782                      | 65.594       |
| 77.5                | 4.586                        | 0.579        | 326.426                      | 62.478       |
| 78.5                | 4.385                        | 0.452        | 222.558                      | 46.877       |
| 79.5                | 5.395                        | 0.574        | 236.466                      | 43.836       |
| 80.5                | 8.299                        | 1.528        | 345.038                      | 53.205       |
| 81.5                | 10.145                       | 1.603        | 396.226                      | 72.239       |
| 82.5                | 12.257                       | 2.145        | 441.869                      | 65.910       |
| 83.5                | 21.979                       | 3.040        | 476.839                      | 62.281       |
| 84.5                | 31.112                       | 7.855        | 464.427                      | 55.665       |
| 85.5                | 16.982                       | 3.687        | 456.611                      | 29.975       |
| 86.5                | 8.355                        | 1.820        | 421.753                      | 73.024       |
| 87.5                | 5.304                        | 0.476        | 286.891                      | 51.174       |
| 88.5                | 7.154                        | 1.058        | 168.242                      | 24.018       |
| 89.5                | 4.620                        | 0.776        | 157.051                      | 25.593       |
| 90.5                | 5.787                        | 1.207        | 180.356                      | 29.883       |
| <b>O2 alone</b>     | 262.716                      | 40.240       | 798.207                      | 85.917       |
| <b>Osym alone</b>   |                              |              |                              |              |
| 76.5                | 994.73                       | 240.77       | 1390.9                       | 226.89       |
| 77.5                | 1007.44                      | 67.71        | 1144.58                      | 59.89        |
| 78.5                | 1068.85                      | 64.47        | 1203.13                      | 121.06       |
| 79.5                | 1261.7                       | 111.52       | 1248.18                      | 63.19        |
| 80.5                | 1666.96                      | 236.12       | 1395.66                      | 94.86        |
| 81.5                | 1693.8                       | 148.36       | 1521.66                      | 97.32        |
| 82.5                | 1473.84                      | 353.19       | 1476.34                      | 315.78       |
| 83.5                | 1146.98                      | 164.71       | 1062.63                      | 124.26       |
| 84.5                | 846.56                       | 19.74        | 1013.71                      | 24.64        |
| 85.5                | 693.49                       | 76.81        | 895.8                        | 92.73        |
| 86.5                | 879.54                       | 8.29         | 1066.6                       | 11.07        |
| 87.5                | 913.81                       | 73           | 1042.96                      | 77.77        |
| 88.5                | 994.66                       | 42.15        | 1024.98                      | 79.56        |
| <b>no operators</b> | 1443.08                      | 102.22       | 1466.13                      | 87.27        |
| <b>downstream</b>   |                              |              |                              |              |
| <b>O2-Osym</b>      | <b>E-IPTG<br/>average</b>    | <b>sd</b>    | <b>E+IPTG<br/>average</b>    | <b>sd</b>    |
| 20.5                | 0.685                        | 0.051        | 3.403                        | 0.168        |
| 22.5                | 0.513                        | 0.067        | 6.751                        | 0.325        |
| 24.5                | 0.364                        | 0.042        | 3.000                        | 0.104        |
| 25.5                | 0.959                        | 0.160        | 9.906                        | 0.453        |
| 26.5                | 8.847                        | 1.218        | 238.402                      | 35.571       |
| 28.5                | 4.620                        | 0.975        | 80.371                       | 6.575        |
| 30.5                | 6.433                        | 0.675        | 108.796                      | 9.751        |

(\*) data reported by Becker et al. (2005).

|                 |        |        |         |         |
|-----------------|--------|--------|---------|---------|
| 32.5            | 8.534  | 0.493  | 146.640 | 5.251   |
| 33.5            | 6.565  | 1.514  | 110.609 | 13.409  |
| 34.5            | 20.456 | 2.573  | 313.103 | 37.220  |
| 35.5            | 17.288 | 4.536  | 135.868 | 12.903  |
| 36.5            | 14.636 | 1.124  | 211.811 | 22.888  |
| 37.5            | 18.332 | 5.117  | 210.619 | 44.670  |
| 38.5            | 54.550 | 7.107  | 714.237 | 52.016  |
| 39.5            | 23.438 | 5.740  | 117.959 | 9.208   |
| 40.5            | 13.194 | 1.017  | 225.591 | 51.014  |
| 41.5            | 11.603 | 2.080  | 131.024 | 51.883  |
| 42.5            | 49.320 | 3.405  | 391.025 | 47.550  |
| 44.5            | 7.418  | 1.594  | 204.004 | 52.505  |
| 46.5            | 8.175  | 1.852  | 446.183 | 136.948 |
| 48.5            | 10.149 | 0.482  | 154.433 | 5.493   |
| 50.5            | 15.724 | 3.431  | 221.279 | 23.833  |
| 52.5            | 6.490  | 1.687  | 121.910 | 32.253  |
| 54.5            | 5.793  | 0.508  | 284.004 | 38.006  |
| 56.5            | 0.341  | 0.046  | 23.328  | 2.309   |
| 58.5            | 0.569  | 0.063  | 40.383  | 3.076   |
| 60.5            | 10.055 | 2.499  | 457.038 | 121.886 |
| 62.5            | 21.044 | 7.326  | 270.475 | 34.750  |
| 67.5            | 0.41   | 0.109  | 27.731  | 2.028   |
| 68.5            | 1.425  | 0.375  | 48.981  | 4.366   |
| 69.5            | 0.74   | 0.165  | 36.042  | 2.958   |
| <b>O2 alone</b> | 95.225 | 15.535 | 188.651 | 43.866  |

**Osym alone**

|                     |       |      |        |       |
|---------------------|-------|------|--------|-------|
| 41.5                | 15.6  | 1.63 | 76.86  | 6.9   |
| 42.5                | 54.64 | 14.1 | 189.69 | 20.73 |
| 44.5                | 48.9  | 5.61 | 191.75 | 17.21 |
| 50.5                | 5.92  | 0.37 | 29.91  | 1.49  |
| 56.5                | 1.98  | 0.26 | 20.81  | 1.29  |
| 62.5                | 3.69  | 0.34 | 9.85   | 1.4   |
| 66.5                | 25.98 | 1.79 | 196.08 | 5.31  |
| 67.5                | 0.82  | 0.13 | 7.34   | 0.87  |
| <b>no operators</b> | 64.60 | 2.94 | 61.60  | 5.14  |

| <b>LacI mutant</b> | <b>E-IPTG</b>  |           | <b>E+IPTG</b>  |           |
|--------------------|----------------|-----------|----------------|-----------|
|                    | <b>average</b> | <b>sd</b> | <b>average</b> | <b>sd</b> |
| <b>O2-Osym</b>     |                |           |                |           |
| 36.5               | 271.814        | 32.891    | 269.03         | 12.766    |
| 37.5               | 429.893        | 55.769    | 411.064        | 84.507    |
| 38.5               | 806.844        | 120.659   | 913.635        | 208.824   |
| 39.5               | 235.466        | 35.148    | 210.572        | 27.722    |
| 40.5               | 387.467        | 81.653    | 330.158        | 56.642    |
| 41.5               | 270.565        | 29.381    | 281.686        | 9.858     |
| 48.5               | 276.144        | 43.021    | 266.698        | 39.317    |
| 50.5               | 255.714        | 55.493    | 227.438        | 30.357    |
| 54.5               | 392.49         | 53.032    | 384.617        | 40.001    |
| 56.5               | 195.12         | 18.366    | 188.388        | 13.94     |
| 58.5               | 145.392        | 38.871    | 149.797        | 47.84     |
| 60.5               | 791.576        | 156.709   | 778.653        | 163.355   |
| 62.5               | 503.346        | 30.343    | 516.66         | 19.979    |
| 67.5               | 161.304        | 22.55     | 169.67         | 12.964    |
| 69.5               | 153.51         | 19.362    | 154.986        | 14.776    |
| <b>O2 alone</b>    | 751.705        | 76.494    | 711.274        | 22.601    |
| <b>Osym alone</b>  |                |           |                |           |
| 42.5               | 301.319        | 28.342    | 260.077        | 18.897    |
| 44.5               | 413.643        | 70.533    | 388.05         | 50.58     |
| 50.5               | 45.27          | 7.897     | 39.863         | 7.274     |
| 56.5               | 30.915         | 5.509     | 25.964         | 5.789     |
| 62.5               | 9.495          | 0.731     | 7.717          | 0.495     |

**Table S3**

|               | promoter set-up | E-IPTG  |      | E+IPTG  |      | E+Ara   |       | E+Ara+IPTG |       | ratio +AI/+A |      |
|---------------|-----------------|---------|------|---------|------|---------|-------|------------|-------|--------------|------|
|               |                 | average | sd   | average | sd   | average | sd    | average    | sd    | average      | sd   |
| <b>BL1076</b> | Osym-T7-O1      | 0.42    | 0.05 | 4.80    | 1.16 | 1.79    | 0.83  | 30.18      | 7.45  | 19.70        | 9.30 |
| <b>BL1093</b> | T7-O1           | 17.77   | 9.30 | 17.33   | 8.63 | 127.24  | 12.09 | 62.95      | 24.56 | 0.50         | 0.21 |
| <b>BL1095</b> | T7-O1-Osym      | 13.61   | 6.51 | 13.08   | 5.41 | 94.17   | 10.01 | 54.76      | 20.29 | 0.59         | 0.24 |

**Table S4**

| <b>plasmid</b> | <b>strain</b> | <b>operators<sup>a</sup></b> | <b>insert (bp)<sup>b</sup></b> |
|----------------|---------------|------------------------------|--------------------------------|
| pJ1778         | BL966         | O2/Osym                      | 0                              |
| pJ1811         | BL974         | O2/Osym                      | +20                            |
| pJ1812         | BL976         | O2/Osym                      | +40                            |
| pJ1779         | BL968         | -/Osym                       | 0                              |
| pJ1813         | BL978         | -/Osym                       | +20                            |
| pJ1814         | BL980         | -/Osym                       | +40                            |
| pJ1780         | BL970         | O2/-                         | 0                              |
| pJ1815         | BL982         | O2/-                         | +20                            |
| pJ1816         | BL984         | O2/-                         | +40                            |
| pJ1781         | BL972         | -/-                          | 0                              |
| pJ1817         | BL986         | -/-                          | +20                            |
| pJ1818         | BL988         | -/-                          | +40                            |

<sup>a</sup> Indicates functional or dead operators in this study. In all cases, the operator center to center distance is 50.5 bp.

<sup>b</sup> Indicates bp size of insert added between transcriptional start site and proximal operator (functional or dead).

**Table S5**

| <b>spacing (bp)<sup>a</sup></b> | <b>plasmid</b> | <b>strain</b> | <b>promoter<sup>b</sup></b> | <b>location<sup>c</sup></b> | <b>loop<sup>d</sup></b> |
|---------------------------------|----------------|---------------|-----------------------------|-----------------------------|-------------------------|
| O2 only                         | pJ992          | BL546         | UV5                         |                             |                         |
| 84.5                            | pJ967          | BL596         | UV5                         | upstream                    | twisted                 |
| 77.5                            | pJ962          | BL600         | UV5                         | upstream                    | relaxed                 |
| 62.5                            | pJ1888         | BL1046        | UV5                         | downstream                  | twisted                 |
| 58.5                            | pJ1890         | BL1050        | UV5                         | downstream                  | relaxed                 |
| 86.5                            | pJ1906         | BL1076        | T7                          | upstream                    | relaxed                 |
| 58.5                            | pJ1940         | BL1095        | T7                          | downstream                  | relaxed                 |
| O1 only                         | pJ1938         | BL1093        | T7                          |                             |                         |

<sup>a</sup> Indicates operator center to center distance in bp. Samples with only a single functional operator are indicated.

<sup>b</sup> Constructs contain either a UV5 or T7 transcriptional promoter. The T7 promoters serve as a promoterless control since T7 RNA polymerase is not being expressed in these cells at the time of assay.

<sup>c</sup> Location of the operators relative to the transcriptional start site.

<sup>d</sup> Indicates the looping flexibility of constructs based on in vivo  $\beta$ -gal assay.



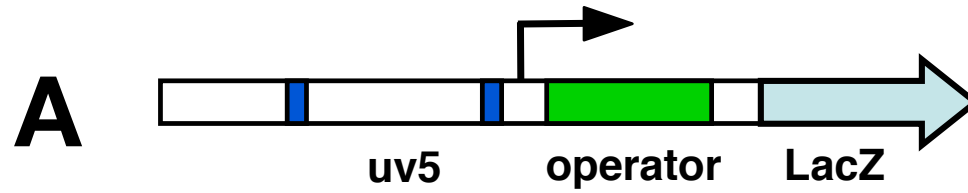

|             |                                                  | plasmid | strain |
|-------------|--------------------------------------------------|---------|--------|
| <b>Osym</b> | <b>AATTGTGAGC GCTCACAATT</b>                     | pJ949   | BL539  |
| <b>O1</b>   | <b>AATTGTGAGC<b>GGATA</b>ACAATT</b>              | pJ991   | BL683  |
| <b>O2</b>   | <b>AA<b>a</b>TGTGAGC<b>GagT</b>ACA<b>acc</b></b> | pJ992   | BL546  |
| <b>O3</b>   | <b><b>ggca</b>GTGAGC<b>GcAacg</b>CAATT</b>       | pJ993   | BL548  |

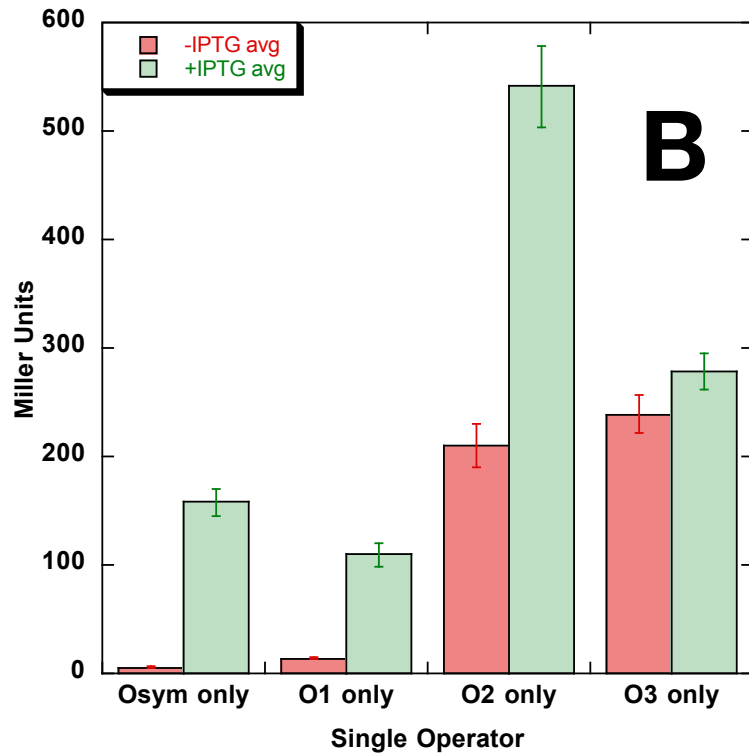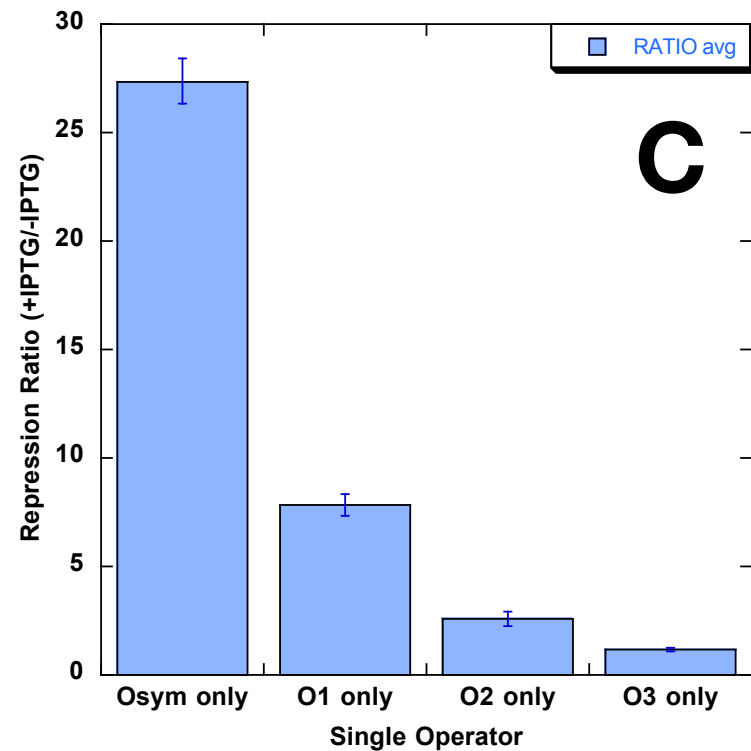

figure s1

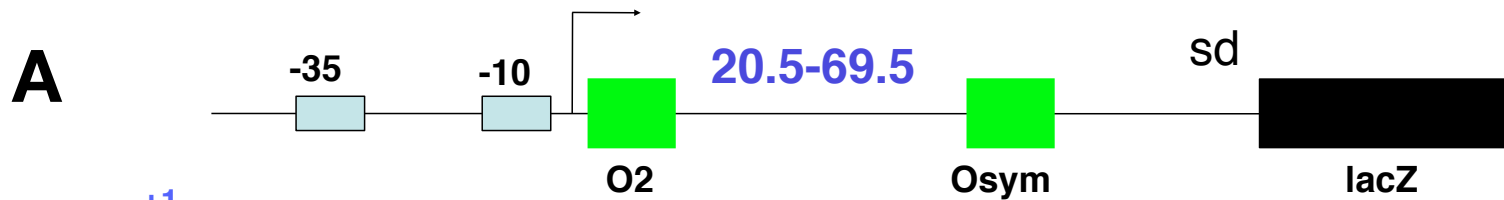

**B**

+1 ●

|                                                                                                                                                                                                   | spacing | plasmid | strains   |
|---------------------------------------------------------------------------------------------------------------------------------------------------------------------------------------------------|---------|---------|-----------|
| GTCGACC A A A T G T G A G C G A G T A A C A A C C G A A T T C C T G C A T G C C G C C G G A G C T C T G G T A C C C T G G A T C C a c g c t a G C A A T T G T G A G C G C T C A C A A T T         | 69.5    | 1911    | 1072/1073 |
| GTCGACC A A A T G T G A G C G A G T A A C A A C C G A A T T C C T G C A T G C C G C C G G A G C T C T G G T A C C C T G G A T C C a c g c t a G C A A T T G T G A G C G C T C A C A A T T G       | 68.5    | 1912    | 1074/1075 |
| GTCGACC A A A T G T G A G C G A G T A A C A A C C G A A T T C C T G C A T G C C G C C G G A G C T C T G G T A C C C T G G A T C C a c g c t a A A T T G T G A G C G C T C A C A A T T G C         | 67.5    | 1910    | 1068/1069 |
| GTCGACC A A A T G T G A G C G A G T A A C A A C C G A A T T C C T G C A T G C C T G G T A C C C T G G A T C C a c g c t a G C G G C C A A T T G T G A G C G C T C A C A A T T G C                 | 62.5    | 1888    | 1046/1047 |
| GTCGACC A A A T G T G A G C G A G T A A C A A C C G A A T T C C T G C A T G C C T G G T A C C C T G G A T C C a c g c t a G C G G A A T T G T G A G C G C T C A C A A T T C C G C                 | 60.5    | 1889    | 1048/1049 |
| GTCGACC A A A T G T G A G C G A G T A A C A A C C G A A T T C C T G C A T G C C T G G T A C C C T G G A T C C a c g c t a G C A A T T G T G A G C G C T C A C A A T T G G C C G C                 | 58.5    | 1890    | 1050/1051 |
| GTCGACC A A A T G T G A G C G A G T A A C A A C C G A A T T C C T G C A T G C C T G G T A C C C T G G A T C C a c g c t a A A T T G T G A G C G C T C A C A A T T G C G G C C G C                 | 56.5    | 1852    | 990/991   |
| GTCGACC A A A T G T G A G C G A G T A A C A A C C G A A T T C C T G C A T G C C T G G T A C C C T G G A T C C a c g c t a A A T T G T G A G C G C T C A C A A T T t a G C G G C C G C             | 54.5    | 1838    | 992/993   |
| GTCGACC A A A T G T G A G C G A G T A A C A A C C G A A T T C C T G C A T G C C T G G T A C C C T G G A T C C a c g c t a A A T T G T G A G C G C T C A C A A T T g c t a G C G G C C G C         | 52.5    | 1839    | 1024/1025 |
| GTCGACC A A A T G T G A G C G A G T A A C A A C C G A A T T C C T G C A T G C C T G G T A C C C T G G A T C C A A T T G T G A G C G C T C A C A A T T a c g c t a G C G G C C G C                 | 50.5    | 1840    | 994/995   |
| GTCGACC A A A T G T G A G C G A G T A A C A A C C G A A T T C C T G C A T G C C T G G T A C C C T G G A T C C a c g c t a A A T T G T G A G C G C T C A C A A T T C C a c g c t a G C G G C C G C | 48.5    | 1853    | 996/997   |
| GTCGACC A A A T G T G A G C G A G T A A C A A C C G A A T T C C T G C A T G C C T G G T A C C C T G G A A T T G T G A G C G C T C A C A A T T A T C C a c g c t a G C G G C C G C                 | 46.5    | 1841    | 998/999   |
| GTCGACC A A A T G T G A G C G A G T A A C A A C C G A A T T C C T G C A T G C C T G G T A C C C T A A T T G T G A G C G C T C A C A A T T G G A T C C a c g c t a G C G G C C G C                 | 44.5    | 1842    | 1000/1001 |
| GTCGACC A A A T G T G A G C G A G T A A C A A C C G A A T T C C T G C A T G C C T G G T A C C A A T T G T G A G C G C T C A C A A T T C T G G A T C C a c g c t a G C G G C C G C                 | 42.5    | 1843    | 1002/1003 |
| GTCGACC A A A T G T G A G C G A G T A A C A A C C G A A T T C C T G C A T G C C T G G T A C A A T T G T G A G C G C T C A C A A T T C C T G G A T C C a c g c t a G C G G C C G C                 | 41.5    | 1893    | 1056/1057 |
| GTCGACC A A A T G T G A G C G A G T A A C A A C C G A A T T C C T G C A T G C C T G G T A A A T T G T G A G C G C T C A C A A T T C C C T G G A T C C a c g c t a G C G G C C G C                 | 40.5    | 1854    | 1004/1005 |
| GTCGACC A A A T G T G A G C G A G T A A C A A C C G A A T T C C T G C A T G C C T G G T A A T T G T G A G C G C T C A C A A T T A C C C T G G A T C C a c g c t a G C G G C C G C                 | 39.5    | 1894    | 1058/1059 |
| GTCGACC A A A T G T G A G C G A G T A A C A A C C G A A T T C C T G C A T G C C T G G A A T T G T G A G C G C T C A C A A T T T A C C C T G G A T C C a c g c t a G C G G C C G C                 | 38.5    | 1844    | 1006/1007 |
| GTCGACC A A A T G T G A G C G A G T A A C A A C C G A A T T C C T G C A T G C C T G A A T T G T G A G C G C T C A C A A T T G T A C C C T G G A T C C a c g c t a G C G G C C G C                 | 37.5    | 1895    | 1060/1061 |
| GTCGACC A A A T G T G A G C G A G T A A C A A C C G A A T T C C T G C A T G C C T A A T T G T G A G C G C T C A C A A T T G G T A C C C T G G A T C C a c g c t a G C G G C C G C                 | 36.5    | 1845    | 1008/1009 |
| GTCGACC A A A T G T G A G C G A G T A A C A A C C G A A T T C C T G C A T G C C A A T T G T G A G C G C T C A C A A T T T G G T A C C C T G G A T C C a c g c t a G C G G C C G C                 | 35.5    | 1896    | 1062/1063 |
| GTCGACC A A A T G T G A G C G A G T A A C A A C C G A A T T C C T G C A T G C A A T T G T G A G C G C T C A C A A T T C T G G T A C C C T G G A T C C a c g c t a G C G G C C G C                 | 34.5    | 1846    | 1010/1011 |
| GTCGACC A A A T G T G A G C G A G T A A C A A C C G A A T T C C T G C A T G A A T T G T G A G C G C T C A C A A T T C C T G G T A C C C T G G A T C C a c g c t a G C G G C C G C                 | 33.5    | 1897    | 1064/1065 |
| GTCGACC A A A T G T G A G C G A G T A A C A A C C G A A T T C C T G C A T A A T T G T G A G C G C T C A C A A T T G C C T G G T A C C C T G G A T C C a c g c t a G C G G C C G C                 | 32.5    | 1847    | 1012/1013 |
| GTCGACC A A A T G T G A G C G A G T A A C A A C C G A A T T C C T G C A A T T G T G A G C G C T C A C A A T T A T G C C T G G T A C C C T G G A T C C a c g c t a G C G G C C G C                 | 30.5    | 1855    | 1014/1015 |
| GTCGACC A A A T G T G A G C G A G T A A C A A C C G A A T T C C T A A T T G T G A G C G C T C A C A A T T G C A T G C C T G G T A C C C T G G A T C C a c g c t a G C G G C C G C                 | 28.5    | 1848    | 1016/1017 |
| GTCGACC A A A T G T G A G C G A G T A A C A A C C G A A T T C A A T T G T G A G C G C T C A C A A T T C T G C A T G C C T G G T A C C C T G G A T C C a c g c t a G C G G C C G C                 | 26.5    | 1837    | 1018/1019 |
| GTCGACC A A A T G T G A G C G A G T A A C A A C C G A A T T A A T T G T G A G C G C T C A C A A T T C C T G C A T G C C T G G T A C C C T G G A T C C a c g c t a G C G G C C G C                 | 25.5    | 1898    | 1066/1067 |
| GTCGACC A A A T G T G A G C G A G T A A C A A C C G A A T T A A T T G T G A G C G C T C A C A A T T T C C T G C A T G C C T G G T A C C C T G G A T C C a c g c t a G C G G C C G C               | 24.5    | 1861    | 1026/1027 |
| GTCGACC A A A T G T G A G C G A G T A A C A A C C G A A T T G T G A G C G C T C A C A A T T A T T C C T G C A T G C C T G G T A C C C T G G A T C C a c g c t a G C G G C C G C                   | 22.5    | 1862    | 1028/1029 |
| GTCGACC A A A T G T G A G C G A G T A A C A A C C A A T T G T G A G C G C T C A C A A T T G A A T T C C T G C A T G C C T G G T A C C C T G G A T C C a c g c t a G C G G C C G C                 | 20.5    | 1863    | 1030/1031 |

Sall O2 Osym EcoRI SphI KpnI BamHI NotI

figure s2

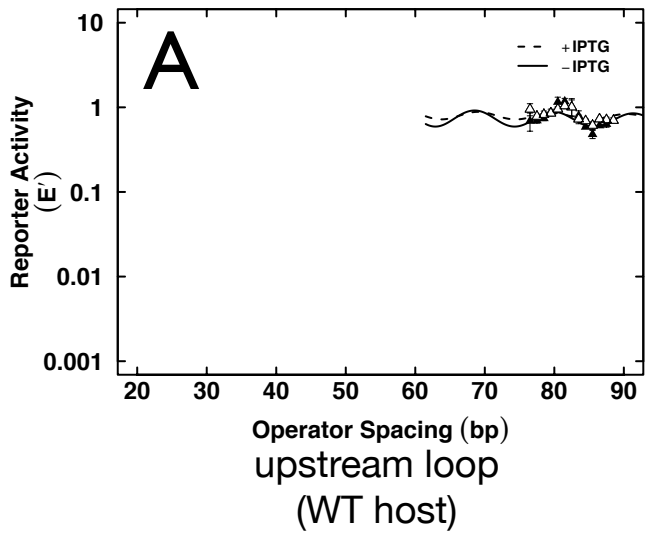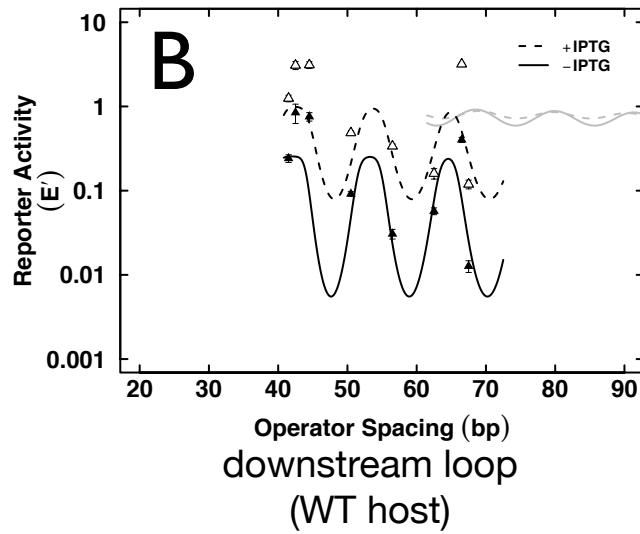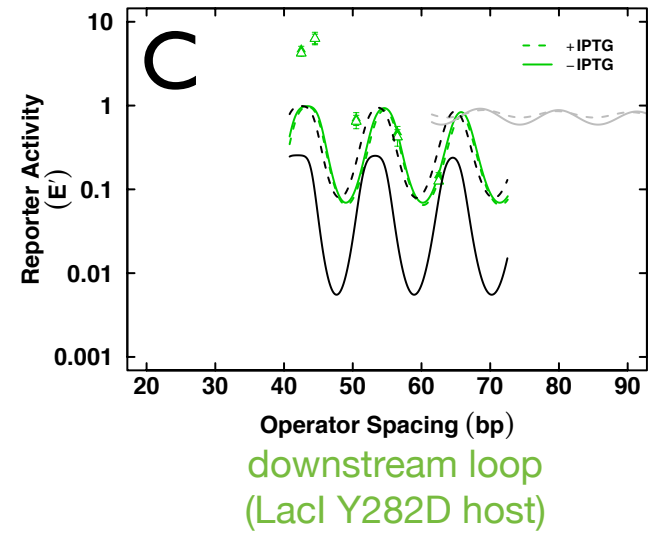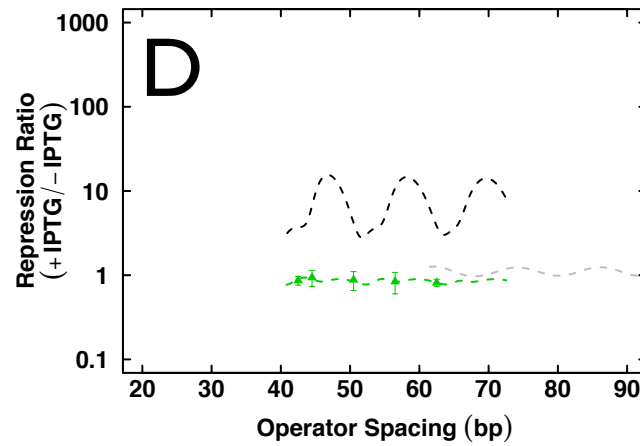

figure s3

**A****Upstream Osym/O1 construct**

pJ1906 (BL1076/BL1077)

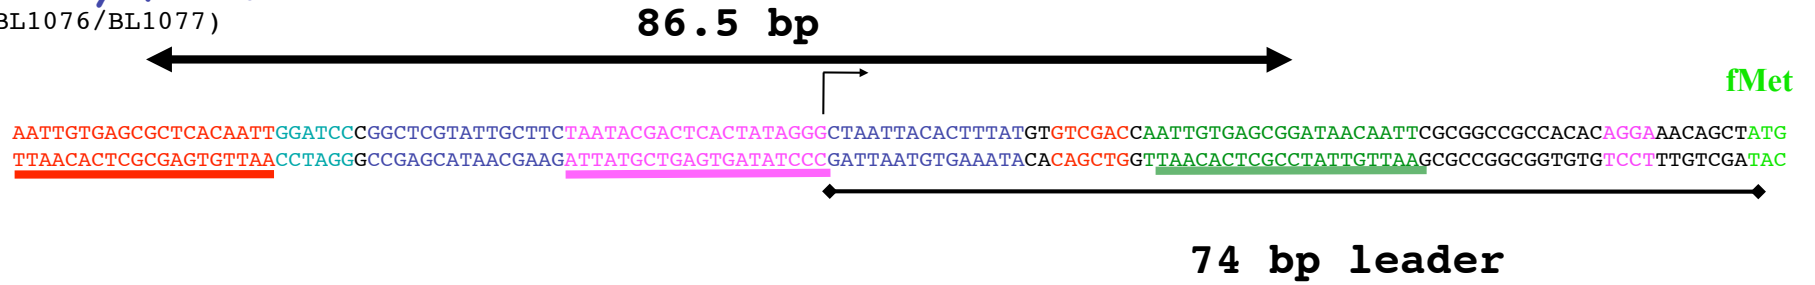**B****O1 only construct**

pJ1938 (BL1093/BL1094)

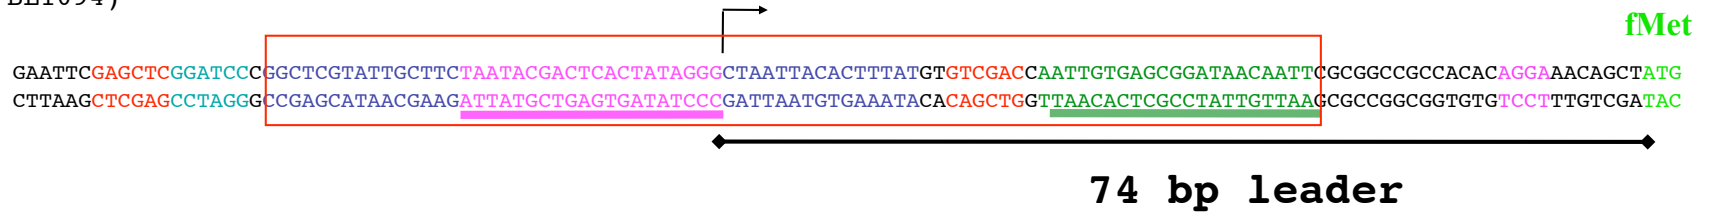**C****O1/Downstream Osym**

pJ1940 (BL1095/BL1096)

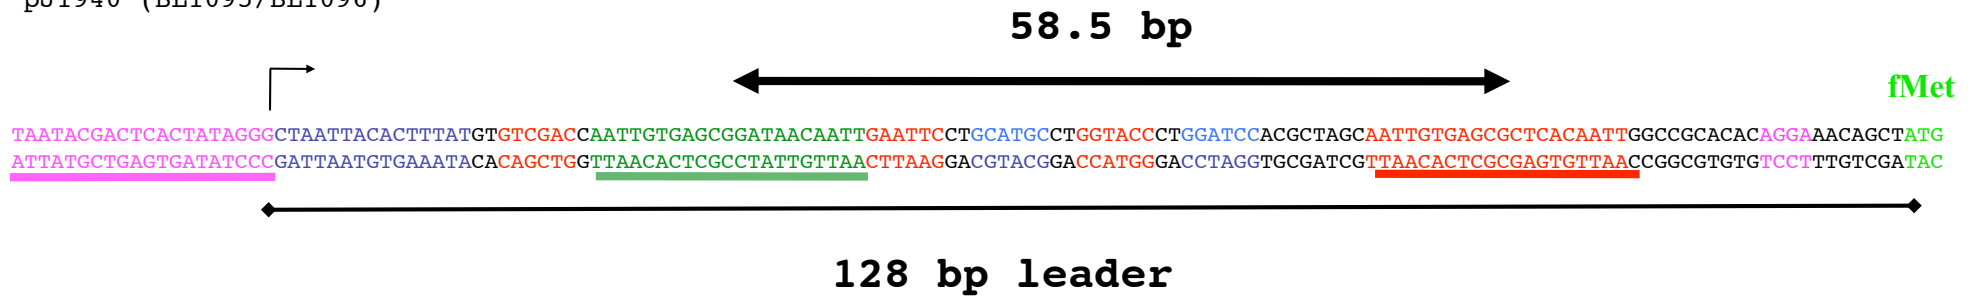

figure s4

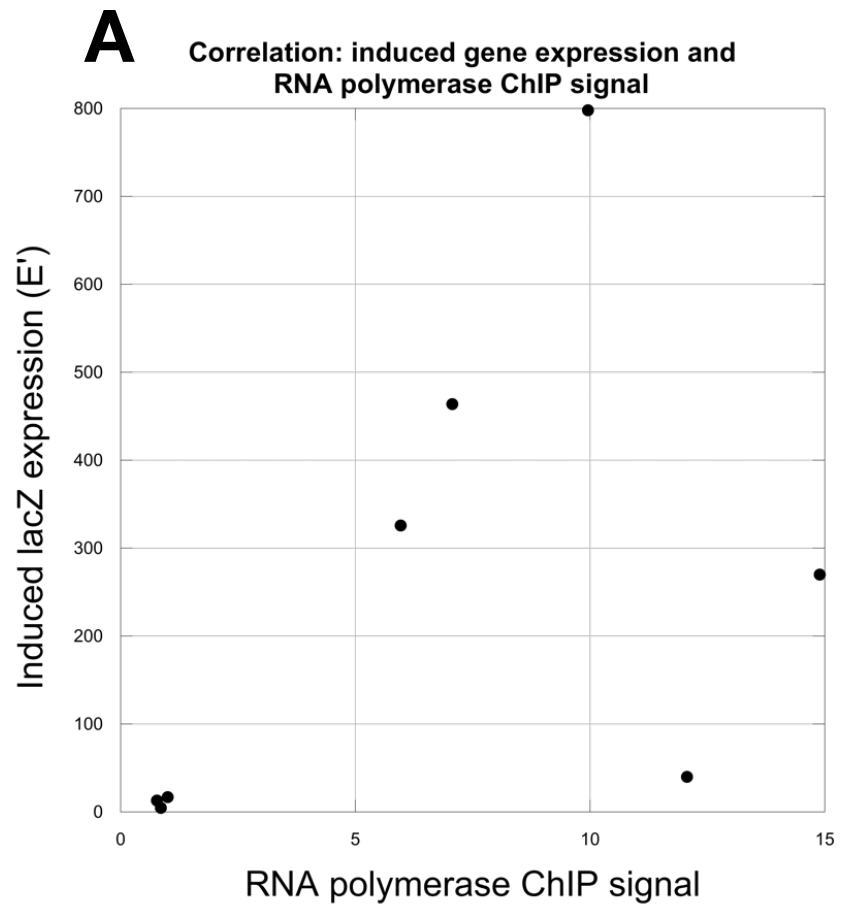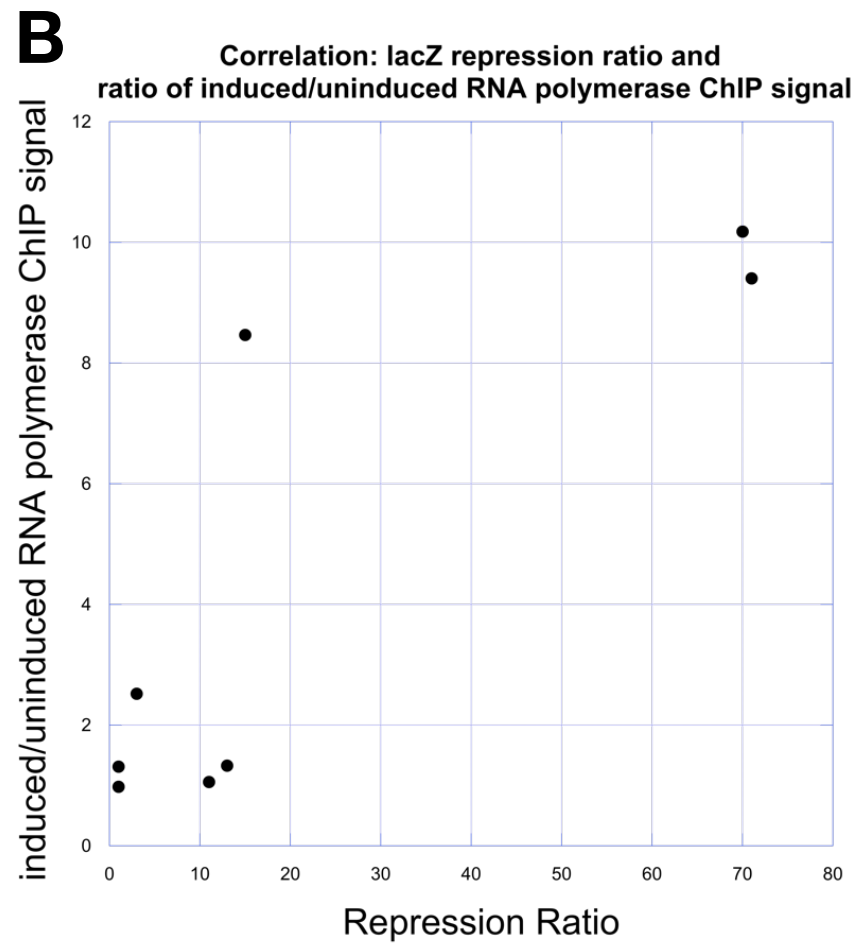

figure s5

**Supplemental figure legends S1-S5:**

Figure S1. *In vivo* repression behavior of different individual proximal *lac* operators in the absence of DNA looping. A. Test construct format showing position of proximal operator (green) relative to *lac* uv5 promoter. *Lac* operator sequences are shown below, with differences relative to the symmetric  $O_{\text{sym}}$  operator shown in color and lower case. The transcription start site is 3 nt upstream of the proximal operator. B. Reporter gene (*lacZ*) readout as Miller units in the absence (red) or presence (green) of IPTG inducer. C. Repression ratio based on data in B.

Figure S2. Design of promoter-reporter constructs with repression loops downstream of the promoter. A. Layout of control elements and reporter gene, showing promoter elements (-35, -10), promoter transcription start point (broken arrow), variably spaced weak and strong *lac* operators ( $O_2$  and  $O_{\text{sym}}$ , respectively), Shine-Dalgarno sequence (sd) and *lacZ* reporter gene. B. Sequences of constructs studied in these experiments. Transcription start point (+1), restriction endonuclease cleavage sites (bottom), and center-center operator spacings (right) are indicated.

Figure S3. Repression data for promoter-reporter constructs involving single auxiliary  $O_{\text{sym}}$  operators without DNA looping. A. Induced (open triangles, dashed fit curve) and repressed (filled triangles, solid fit curve) reporter activity ( $E'$ ) dataset with fits to thermodynamic model for *upstream* constructs containing only an  $O_{\text{sym}}$  operator. B. Induced (open triangles, dashed fit curve) and repressed (filled triangles, solid fit curve)

reporter activity ( $E'$ ) dataset with fits to thermodynamic model for *downstream* constructs containing only an  $O_{\text{sym}}$  operator. C. With model fits as in (B; grey and black) but including reporter activity ( $E'$ ) data and model fit (green) for downstream constructs in *E. coli* lacking functional lac repressor (LacI Y282D). D. Repression ratio data fits for constructs containing only a single auxiliary  $O_{\text{sym}}$  operator upstream (dashed grey), downstream (WT lac repressor in the presence of IPTG; dashed black), and downstream (in the absence of functional lac repressor; LacI Y282D; dashed green).

Figure S4. Details of promoter-reporter constructs to analyze DNA looping effects on a T7 RNA polymerase promoter that does not overlap with lac  $O_1$  or  $O_{\text{sym}}$  operators. A. T7 promoter (underlined, magenta) configured within a DNA loop with in-phase 86.5-bp (center-center) DNA loop between  $O_{\text{sym}}$  (underlined, red) and  $O_1$  (underlined, green) *lac* operators. B. T7 promoter (underlined, magenta) configured upstream of lac  $O_1$  operator (underlined, green) in the absence of DNA looping. C. T7 promoter (underlined, magenta) configured upstream of a DNA loop with in-phase 58.5-bp (center-center) DNA loop between  $O_1$  (underlined, green) and  $O_{\text{sym}}$  (underlined, red) *lac* operators.

Figure S5. Correlations between *lacZ* gene expression and RNA polymerase chromatin immunoprecipitation (ChIP) signal. A. Correlation between IPTG-induced  $\beta$ -galactosidase activity and RNA polymerase ChIP signal. B. Correlation between  $\beta$ -galactosidase repression ratio ( $RR$ ) and the ratio of induced to uninduced RNA polymerase ChIP signals.
